# Supplementary material for: Knowledge and attitudes towards smoking cessation counselling: an Italian cross-sectional survey on tertiary care nursing staff
Source: PeerJ journal article supplement (doi:10.7717/peerj.12213), 2021-10-15
Supplement: English_Questionnaire.pdf [file English_Questionnaire.pdf]

English translation

**SURVEY ON KNOWLEDGE AND ATTITUDE TOWARDS SMOKING CESSATION  
COUNSELLING IN THE DEPARTMENTS OF CARDIOLOGY, CARDIAC INTENSIVE CARE  
UNIT AND ONCOLOGY SURGERY OF THE AOUP AND CIVIC HOSPITAL OF PALERMO**

We ask your cooperation in filling out the following questionnaire anonymously. The data will be used to assess the attitude and knowledge of nursing staff with regard to smoking cessation counselling. Counselling is a process that, through dialogue and interaction, helps people to solve and manage problems (in our case tobacco addiction) and to make decisions.

Personal data

Gender

- Male                       Female

Age

- < 30                       Between 30-40                       > 40

Education

- Regional nursing school                       Nursing diploma                       Degree                       Master's degree

Membership hospital ward

- Cardiology at AOUP "Paolo Giaccone"                       Cardiology at ARNAS Civico  
 Cardiac ICU at AOUP "Paolo Giaccone"                       Cardiac ICU at ARNAS Civico  
 Oncology at AOUP "Paolo Giaccone"                       Oncology at ARNAS Civico

Q1 Check the diseases for which you think cigarette smoking is an important causative factor:

Malignant neoplasms:

- Mouth cancer                       Cancer of the oesophagus                       Laryngeal cancer                       Lung cancer  
 Ureter cancer                       Bladder cancer                       Cervical cancer                       Kidney cancer  
 Leukaemia                       Stomach cancer  
 Pancreatic cancer

Respiratory diseases and disorders:

- Chronic Obstructive Pulmonary Diseases                       Pneumonia                       Acute and chronic bronchitis                       Asthma

Heart and vascular diseases:

- Heart disease (heart attack)                       Cerebrovascular disease (stroke)  
 Abdominal aortic aneurysm                       Arteriosclerosis

Other diseases:

- Infertility       Impotence     Complications in pregnancy  
 Cataract         Gastric and duodenal ulcer

Q2 Are you smoker?

- Yes                 Not                       Ex-smoker

Please, if you use other products containing tobacco (e.g., pipe, cigar), indicate this in the space below:

\_\_\_\_\_

If you currently smoke:

Q3.1 How long have you been smoking? \_\_\_\_\_

Q3 .2 How many cigarettes do you smoke a day? \_\_\_\_\_

If you use other tobacco products, answer the following questions:

Q3.3 How long have you been using them? \_\_\_\_\_

Q3.4 How many times a day do you use these products? \_\_\_\_\_

Q4. Do you believe you have received adequate training (Degree course, postgraduate courses, master, CME - Continuing Medical Education) on the health damage caused by cigarette smoking?

- Absolutely Not  
 Not  
 Quite  
 Yes  
 Absolutely Yes

Q5a. The inpatient ward is the ideal place to provide information on the health damage caused by cigarette smoking

- Absolutely Not  
 Not  
 Quite  
 Yes  
 Absolutely Yes

Q5b. The nurse must always ask the smoker patient weather she/he wants to quit smoking

- Absolutely Not  
 Not  
 Quite  
 Yes  
 Absolutely Yes

Q5c. If the patient decides to quit smoking, the nurse must set a precise start date of smoking cessation

- Absolutely Not
- Not
- Quite
- Yes
- Absolutely Yes

Q5d. The nurse must always explain to the smoker patient the harmful effects of smoking on health

- Absolutely Not
- Not
- Quite
- Yes
- Absolutely Yes

Q5e. The nurse should explain the health benefits of quitting smoking to smoking patients

- Absolutely Not
- Not
- Quite
- Yes
- Absolutely Yes

Q6. The nurse must register the smoking status of each patient on the medical record (also in electronic format)

- Absolutely Not
- Not
- Quite
- Yes
- Absolutely Yes

Q7a. The nurse must do counselling interventions to smoking cessation in the context of clinical activity

- Absolutely Not
- Not
- Quite
- Yes
- Absolutely Yes

Q7b. It is difficult to explain the health benefits deriving from smoking cessation because it takes time off nursing care

- Absolutely Not
- Not
- Quite
- Yes
- Absolutely Yes

Q7c. In general, the nurse has limited knowledge of the negative effects of smoking on health

- Absolutely Not
- Not
- Quite
- Yes
- Absolutely Yes

Q7d. The nurse is not able to help the smoker patient to stop smoking

- Absolutely Not
- Not
- Quite
- Yes
- Absolutely Yes

Q8a. The nurse who advises smoker patients to quit smoking makes them uncomfortable

- Absolutely Not
- Not
- Quite
- Yes
- Absolutely Yes

Q8b. If the nurse advises the smoker patient to stop smoking, the patient considers him a moralist

- Absolutely Not
- Not
- Quite
- Yes
- Absolutely Yes

Q8c. Patients appreciate the nurse who advises them to stop smoking

- Absolutely Not
- Not
- Quite
- Yes
- Absolutely Yes

Q8d. The nurse who advises patients to stop smoking will cause many smokers to quit smoking

- Absolutely Not
- Not

- Quite
- Yes
- Absolutely Yes

Q8e. The nurse who advises patients to stop smoking gives a good picture of him/herself

- Absolutely Not
- Not
- Quite
- Yes
- Absolutely Yes

Q8f. The nurse who advises patients to stop smoking will help reduce the incidence of cardiovascular disease and other smoking-related diseases among smokers

- Absolutely Not
- Not
- Quite
- Yes
- Absolutely Yes
