# Supplementary material for: Knowledge and attitudes towards smoking cessation counselling: an Italian cross-sectional survey on tertiary care nursing staff
Source: PeerJ. 2021 Oct 15;9:e12213. doi: 10.7717/peerj.12213 (PMC8522640; doi:10.7717/peerj.12213)
Supplement: Supplemental Information 1 — Answers to the questionnaire from 77 nurses. [file peerj-09-12213-s001.xlsx]

## Sheet: Foglio1
id	sex	age	education	Unit	Mouth cancer	Laryngeal cancer	Lung cancer	Cancer of the oesophagus	Ureter cancer	Bladder cancer	Cervical cancer	Kidney cancer	Leukaemia	Stomach cancer	Pancreatic cancer	Chronic Obstructive Pulmonary Diseases	Pneumonia	Acute and chronic bronchitis	Asthma	Heart disease (heart attack)	Cerebrovascular disease (stroke)	Abdominal aortic aneurysm	Arteriosclerosis	Infertility	Impotence	Complications in pregnancy	Cataract	Gastric and duodenal ulcer	Q2	Q3.1	Q3.2	Q3.3	Q3.4	Q4	Q5a	Q5b	Q5c	Q5d	Q5e	Q6	Q7a	Q7b	Q7c	Q7d	Q8a	Q8b	Q8c	Q8d	Q8e
1	F	2	2	4	0	0	1	0	0	1	0	0	0	0	0	1	0	1	0	1	0	0	0	0	1	0	0	0	2	0	0	0	0	3	2	4	3	2	3	4	3	4	3	2	2	3	2	3	3
2	F	3	1	4	0	1	1	0	0	0	0	0	0	0	0	1	0	0	0	0	0	0	0	0	0	0	0	0	0	0	0	0	0	3	2	1	1	1	2	2	1	3	1	1	1	1	1	1	1
3	M	3	2	4	0	0	1	0	0	0	0	0	0	0	0	1	0	0	0	1	0	0	0	0	0	1	0	0	0	0	0	0	0	3	4	3	3	4	4	4	4	3	4	3	4	3	2	2	3
4	M	3	1	4	1	1	1	0	0	0	0	0	0	0	0	1	0	1	1	1	1	0	1	0	1	1	0	1	2	0	0	0	0	3	4	3	1	4	5	4	3	4	3	3	2	1	2	2	3
5	F	3	1	4	0	1	1	0	0	0	0	0	0	0	0	1	1	1	1	1	1	0	1	0	0	1	0	1	0	0	0	0	0	4	3	3	3	4	4	3	4	3	3	2	2	5	1	2	3
6	F	3	2	4	1	1	1	1	0	0	0	0	0	0	0	1	0	0	0	1	1	0	1	0	0	0	0	1	2	0	0	0	0	1	2	2	1	4	3	4	4	4	2	2	1	1	4	4	1
7	M	3	1	4	1	1	1	1	0	0	0	0	0	0	0	1	0	1	1	1	1	0	0	0	1	0	0	0	0	0	0	0	0	2	2	3	2	3	3	3	3	3	3	3	2	2	2	2	2
8	M	3	1	4	1	1	1	1	0	0	0	0	0	0	0	1	1	1	1	1	1	0	1	0	0	1	0	1	2	0	0	0	0	2	4	3	1	5	5	4	3	4	3	1	1	4	3	2	4
9	F	3	3	4	0	0	0	0	0	0	0	0	0	0	0	1	0	1	1	1	1	0	0	1	1	1	1	1	1	40	10	0	0	3	3	2	1	4	4	4	4	4	1	1	2	3	3	1	1
10	F	3	1	4	0	0	0	0	0	0	0	1	0	0	0	1	0	0	0	1	0	0	0	0	0	0	0	0	1	20	7	0	0	3	4	3	2	3	3	4	3	4	4	3	3	4	2	2	3
11	M	3	1	4	0	1	1	0	0	0	0	0	0	0	0	1	0	0	0	1	0	0	0	1	1	0	0	0	0	0	0	0	0	2	3	2	1	3	4	5	1	2	2	1	3	2	2	1	2
12	M	3	1	4	0	0	1	0	0	0	0	0	0	0	0	0	0	0	1	1	0	0	0	0	0	0	0	1	2	0	0	0	0	1	1	3	3	5	5	5	5	5	2	3	2	3	1	1	3
13	M	3	1	4	1	1	1	1	0	0	0	0	0	0	0	1	0	0	0	1	1	0	1	0	0	0	0	0	0	0	0	0	0	1	3	1	1	4	4	2	2	3	3	2	1	1	2	2	1
14	M	3	1	4	1	1	1	0	0	0	0	0	0	0	0	0	0	1	0	1	0	0	0	0	0	0	0	1	1	30	10	0	0	2	2	3	2	3	4	3	2	3	3	5	4	3	4	2	2
15	F	3	1	4	1	1	1	0	0	0	0	0	0	0	0	1	0	0	0	1	1	0	0	1	0	0	0	0	0	0	0	0	0	1	2	2	1	4	4	2	3	2	2	4	2	3	1	2	2
16	M	3	1	3	0	0	1	0	0	0	0	0	0	0	0	1	1	0	1	1	1	0	0	0	1	0	0	0	2	0	0	0	0	3	3	2	4	2	3	2	2	3	3	2	3	2	1	2	3
17	F	3	3	3	1	1	1	0	0	0	0	0	0	0	0	0	0	1	1	1	1	0	1	0	0	1	0	1	0	0	0	0	0	2	3	3	3	4	4	3	3	3	3	3	2	2	3	3	3
18	M	3	1	3	1	1	1	0	0	0	0	0	0	0	0	0	0	1	0	1	1	0	1	1	1	0	0	0	2	0	0	0	0	1	2	1	2	3	3	3	2	3	2	2	2	1	4	2	3
19	F	3	3	3	0	0	1	0	0	0	0	0	0	0	0	1	0	0	0	1	1	1	0	1	1	0	0	1	1	35	30	0	0	1	4	5	4	4	4	3	3	3	4	4	4	4	5	4	3
20	M	3	2	3	1	1	1	1	0	0	0	0	0	1	0	1	0	0	0	1	1	0	1	1	1	0	0	1	1	30	25	0	0	1	5	5	4	5	5	3	3	3	4	4	4	4	4	4	4
21	F	3	3	3	1	1	1	1	0	0	0	1	0	0	0	1	0	0	0	1	1	0	0	1	0	0	0	1	1	20	25	0	0	1	5	3	4	5	4	4	3	4	5	4	5	4	5	4	5
22	F	3	1	3	1	1	1	1	0	0	0	0	0	0	0	1	0	0	0	1	1	0	0	0	0	0	0	0	0	0	0	0	0	1	3	1	1	3	4	2	2	3	2	3	1	1	2	3	1
23	F	3	1	3	0	0	0	0	0	1	0	0	0	0	0	1	1	1	1	1	0	0	1	0	1	0	0	0	0	0	0	0	0	3	3	2	3	2	3	3	2	2	3	4	3	2	2	2	3
24	M	3	1	3	1	0	1	0	0	0	0	0	0	0	0	0	1	1	1	1	1	0	0	0	1	0	0	0	1	40	15	0	0	2	2	3	2	2	3	3	4	3	4	4	3	1	2	3	2
25	F	3	1	3	1	0	0	0	0	0	0	0	0	0	1	0	1	1	1	1	1	0	0	0	1	0	0	0	0	0	0	0	0	3	4	2	3	2	3	3	2	4	3	4	4	2	1	2	4
26	M	3	1	3	1	0	1	0	0	0	0	0	0	0	0	1	0	0	0	1	1	0	0	0	0	1	0	0	2	0	0	0	0	3	3	2	3	2	3	5	1	2	2	1	3	2	2	1	2
27	M	3	1	3	1	0	1	0	0	0	0	0	0	0	1	1	1	1	1	1	1	1	1	0	1	0	0	0	2	0	0	0	0	2	3	2	3	2	3	4	3	2	3	3	3	4	3	3	2
28	F	3	1	5	0	0	1	0	0	0	0	0	0	0	0	1	1	1	1	1	1	0	0	1	0	0	0	0	2	0	0	0	0	3	1	2	1	1	1	1	1	1	3	1	2	3	2	2	2
29	M	2	1	5	1	1	1	0	0	0	0	0	0	0	0	1	1	1	1	0	0	0	0	0	1	1	0	0	0	0	0	0	0	2	2	3	2	2	3	2	3	3	2	3	2	2	3	3	3
30	M	2	3	5	1	1	1	0	0	0	0	0	0	0	0	1	0	1	1	0	0	0	0	0	1	1	0	0	0	0	0	0	0	2	2	3	3	2	3	2	3	2	2	3	3	3	2	3	2
31	M	3	1	5	1	1	1	0	0	0	0	0	0	0	0	1	0	1	1	0	0	0	0	0	1	1	0	0	0	0	0	0	0	2	2	3	2	2	3	2	3	2	3	2	2	3	2	2	2
32	M	2	2	5	1	1	1	1	0	1	0	0	0	0	1	0	0	1	1	1	1	0	0	0	1	1	0	0	1	20	10	0	0	2	2	3	3	2	3	3	2	2	2	2	3	2	2	2	3
33	M	2	2	5	1	1	1	1	0	0	0	0	0	0	0	1	0	1	1	0	0	0	0	0	1	1	0	0	0	0	0	0	0	2	2	3	2	3	3	2	3	3	3	3	2	2	3	3	3
34	M	2	2	5	1	1	1	0	0	0	0	0	0	0	0	1	1	1	1	1	1	0	0	0	1	1	0	0	0	0	0	0	0	2	2	3	3	2	2	3	3	3	3	3	2	2	2	3	2
35	F	2	2	5	1	1	1	0	0	0	0	0	0	0	0	1	0	1	1	1	1	1	0	1	1	1	0	0	1	10	10	0	0	2	2	3	2	2	3	2	3	3	2	2	2	3	2	3	2
36	F	3	1	5	1	0	0	0	0	0	0	0	0	0	0	1	1	1	0	1	0	0	0	0	0	1	0	1	0	0	0	0	0	1	2	1	2	3	3	3	3	4	2	5	4	4	1	1	3
37	M	2	3	5	1	1	1	1	0	0	0	0	0	0	0	1	1	1	1	1	1	0	1	1	0	1	0	0	2	0	0	0	0	2	2	2	1	4	5	1	3	3	3	3	1	4	2	3	4
38	F	1	3	5	1	1	0	0	0	0	0	0	0	0	0	0	0	0	1	0	0	1	0	1	0	0	0	0	0	0	0	0	0	2	2	4	1	5	5	4	4	3	3	4	2	3	2	3	2
39	M	3	1	5	1	1	1	1	0	1	0	0	0	0	0	1	1	1	1	1	1	0	0	1	1	1	0	0	1	30	20	0	0	2	2	3	2	3	3	5	3	1	3	3	1	2	5	3	5
40	M	3	1	5	1	1	1	1	0	1	0	0	0	0	0	1	0	1	1	1	1	0	0	0	1	1	0	0	0	0	0	0	0	3	2	3	3	3	4	3	3	2	3	2	3	3	3	3	3
41	M	2	2	5	1	1	1	0	0	1	0	0	0	0	0	0	0	1	1	1	1	1	0	0	1	1	0	0	0	0	0	0	0	2	2	2	2	3	3	2	2	2	2	2	3	3	3	3	3
42	F	3	1	5	1	1	1	0	0	1	0	0	0	0	0	0	0	1	1	1	1	1	0	0	1	1	0	0	2	0	0	0	0	2	2	2	2	3	3	2	2	2	3	3	2	3	3	2	3
43	F	2	2	5	1	1	1	0	0	1	0	0	0	0	0	0	0	1	1	0	0	0	0	0	1	1	0	0	0	0	0	0	0	2	2	2	3	2	2	2	3	3	3	3	2	3	3	2	3
44	F	2	3	5	1	1	1	0	0	1	0	0	0	0	0	1	1	1	1	1	1	0	0	1	1	1	0	0	2	0	0	0	0	3	2	2	3	2	3	2	2	2	3	3	2	2	3	3	2
45	F	3	1	5	1	1	1	1	0	0	0	0	0	1	0	1	0	1	1	1	1	1	0	0	1	1	0	0	0	0	0	0	0	2	2	3	3	3	3	2	2	3	2	2	2	2	3	3	3
46	M	2	2	5	1	1	1	0	0	0	0	0	0	0	1	1	1	1	1	0	0	0	0	0	1	1	0	0	0	0	0	0	0	2	2	3	2	3	3	3	2	2	2	3	2	2	2	3	2
47	F	3	3	1	1	1	1	0	0	0	0	0	0	0	0	1	0	1	0	1	1	0	1	0	0	1	0	0	0	0	0	0	0	1	4	3	3	5	4	3	4	2	4	2	1	1	2	2	3
48	F	3	2	1	1	1	1	1	0	0	0	0	1	0	0	1	1	1	1	1	1	1	1	1	1	1	1	1	0	0	0	0	0	2	1	4	1	5	5	2	4	1	2	2	1	1	4	1	1
49	M	3	1	1	1	1	1	1	1	1	1	1	1	1	1	1	0	0	0	1	1	1	1	0	1	0	0	0	0	0	0	0	0	3	1	1	4	4	4	3	4	3	4	4	3	4	3	4	3
50	M	2	3	1	1	1	1	1	1	1	1	1	1	1	1	1	1	1	1	1	1	1	1	1	1	1	1	1	1	20	20	0	0	3	4	4	3	5	5	4	4	1	1	1	1	3	4	2	4
51	M	3	1	1	1	1	1	1	1	1	1	1	0	0	0	0	1	1	1	1	0	0	0	1	1	1	1	1	0	0	0	0	0	2	2	2	3	3	4	3	2	2	3	1	2	3	2	2	1
52	F	2	3	1	1	1	1	1	0	0	0	0	0	1	0	1	1	1	1	1	1	1	1	1	1	1	1	1	0	0	0	0	0	2	2	4	3	3	3	5	3	5	2	5	2	3	3	2	3
53	F	3	1	1	1	1	1	1	0	0	0	0	0	0	0	1	0	1	1	1	1	0	1	1	1	1	0	0	0	0	0	0	0	4	4	4	4	4	4	4	4	4	4	4	4	4	4	4	4
54	M	3	1	2	1	1	1	1	0	0	0	0	0	0	0	1	1	1	1	1	1	1	1	1	1	1	0	1	0	0	0	0	0	2	2	4	4	3	4	3	3	3	3	3	2	1	4	2	2
55	F	3	1	2	0	1	1	0	0	0	0	0	0	0	0	1	0	1	1	1	1	0	0	1	0	1	0	0	0	0	0	0	0	3	2	2	2	5	5	3	3	2	3	5	3	4	2	2	2
56	M	3	1	2	1	1	1	1	0	0	0	0	0	0	0	1	0	0	1	1	1	0	1	1	1	0	0	0	0	0	0	0	0	2	4	4	1	5	5	1	4	1	1	3	2	2	4	3	3
57	M	3	1	2	1	1	1	1	0	1	0	0	0	0	0	1	0	0	1	1	1	0	1	1	1	1	1	1	1	20	12	0	0	2	3	3	1	3	3	3	3	3	2	2	2	4	2	2	2
58	F	3	1	2	1	1	1	0	0	1	0	0	0	0	0	1	1	0	0	1	1	0	1	1	1	1	0	0	1	22	10	0	0	5	5	4	3	4	5	4	4	1	1	1	1	3	4	3	3
59	F	3	1	2	1	1	1	0	0	1	0	0	0	0	0	1	0	0	0	1	1	0	1	1	1	1	0	0	0	0	0	0	0	3	4	4	4	5	5	4	4	4	3	2	2	3	2	1	3
60	M	2	3	2	0	0	1	0	0	1	0	0	0	0	0	1	0	0	0	1	1	0	1	1	1	1	0	0	0	0	0	0	0	2	4	4	5	5	5	4	3	4	3	3	2	3	2	2	3
61	F	3	1	2	1	1	1	1	0	0	0	0	0	1	1	1	1	1	1	1	0	1	0	1	1	0	1	0	0	0	0	0	0	3	4	4	1	4	5	4	4	4	2	3	3	4	3	4	3
62	M	3	1	2	1	1	1	1	0	0	0	0	0	0	0	0	1	1	0	1	1	1	1	1	1	1	0	0	0	0	0	0	0	1	3	4	3	5	5	5	5	5	2	3	4	2	4	3	3
63	F	2	3	2	1	0	1	0	0	0	0	0	0	0	0	1	1	1	1	1	1	0	0	0	0	1	0	0	1	15	3	0	0	3	2	4	3	4	4	5	4	4	4	2	2	2	4	2	4
64	M	2	4	2	1	0	1	0	0	0	0	0	0	0	0	0	0	1	0	1	0	0	0	0	0	0	0	1	1	20	10	0	0	2	3	1	1	3	3	2	1	2	3	5	1	2	1	1	1
65	F	3	2	2	1	0	1	0	0	0	0	0	0	0	0	0	0	1	0	1	0	0	0	0	0	0	0	1	0	0	0	0	0	2	3	2	1	3	3	2	1	3	5	3	1	2	1	2	1
66	M	3	3	6	0	0	1	0	0	1	0	0	0	0	0	1	0	0	0	0	0	0	1	1	1	0	0	0	2	0	0	0	0	2	3	3	4	5	5	3	4	1	3	3	4	4	4	3	1
67	F	3	1	6	1	1	1	1	0	0	0	0	0	0	0	1	0	0	0	1	0	0	0	0	0	1	0	0	2	0	0	0	0	1	1	2	1	1	3	1	1	1	1	5	1	1	4	1	3
68	M	3	1	6	1	0	0	0	0	1	0	0	0	0	0	1	0	0	0	1	0	0	0	0	0	0	0	0	1	27	20	10	1	2	3	4	3	4	3	3	3	3	3	2	3	3	2	2	3
69	F	3	2	6	1	1	1	1	0	1	0	0	0	1	1	0	0	0	0	1	1	0	1	1	1	1	1	1	1	30	20	0	0	4	4	3	3	4	4	4	4	4	2	3	3	3	3	3	3
70	F	1	3	6	1	1	1	1	0	0	0	0	0	0	0	1	0	1	0	1	1	0	1	1	1	1	0	0	0	0	0	0	0	2	3	2	2	3	3	2	2	3	2	1	2	3	2	2	2
71	F	3	1	6	1	1	1	1	0	0	0	0	0	0	0	1	1	1	0	1	1	1	0	0	0	1	0	0	2	0	0	0	0	3	3	2	1	3	3	2	2	3	3	3	4	3	1	2	1
72	F	1	3	6	1	1	1	0	0	0	0	0	0	0	0	1	0	1	0	1	1	0	0	0	1	1	0	0	0	0	0	0	0	3	4	4	2	5	5	4	4	2	3	3	2	3	2	3	3
73	F	3	3	6	0	0	0	0	0	0	0	0	0	0	0	1	1	1	0	0	0	0	0	0	0	1	0	0	0	0	0	0	0	4	3	4	3	5	5	4	4	2	3	2	2	3	3	1	4
74	F	3	3	6	0	0	0	0	0	0	0	0	0	0	0	1	1	1	0	0	0	0	0	0	0	1	0	0	0	0	0	0	0	4	3	4	3	5	5	4	4	2	3	2	2	3	3	1	4
75	F	3	3	6	0	0	0	0	0	0	0	0	0	0	0	1	1	1	0	0	0	0	0	0	0	1	0	0	0	0	0	0	0	4	3	4	3	5	5	4	4	2	3	2	2	3	3	1	4
76	F	2	2	6	1	1	1	1	0	0	0	0	0	0	0	1	0	0	1	1	1	0	1	0	1	1	0	1	0	0	0	0	0	1	2	2	1	3	3	3	3	1	1	2	1	1	1	1	1
77	F	3	1	6	1	1	1	1	0	0	0	0	0	0	0	1	1	0	1	1	1	0	1	0	1	1	0	1	1	20	30	0	0	3	2	2	1	1	2	3	3	1	1	2	1	1	1	1	1
[truncated: 3 more columns]

## Sheet: legenda
Sex
M=male
F=female
Age
<30=1
30-40=2
>40=3
Diseases
Yes=1
No=0
Education
Nursing school=1
Nursing diploma=2
Degree=3
Master’s degree=4
Current smoker=1
Former smoker=2
Not smoker=0
1-15 UTIC CIVICO
16-27 CARDIOLOGIA CIVICO
28-46 CH. ONCOLOGICA CIVICO
47-53 CARDIOLOGIA POLICLINICO
54-65 UTIC POLICLINICO
66-77 CH. ONCOLOGICA POLICLINICO
