# Supplementary material for: Knowledge and attitudes towards smoking cessation counselling: an Italian cross-sectional survey on tertiary care nursing staff
Source: PeerJ. 2021 Oct 15;9:e12213. doi: 10.7717/peerj.12213 (PMC8522640; doi:10.7717/peerj.12213)
Supplement: Supplemental Information 2 [file peerj-09-12213-s002.doc]

STROBE Statement—Checklist of items that should be included in reports of ***cross-sectional studies***

|  | Item No | Recommendation |
| --- | --- | --- |
| **Title and abstract** | 1 | (*a*)Indicate the study’s design with a commonly used term in the title or the abstract page 1 |
| (*b*) Provide in the abstract an informative and balanced summary of what was done and what was found page 1 |
| Introduction | | |
| Background/rationale | 2 | Explain the scientific background and rationale for the investigation being reported page 3 |
| Objectives | 3 | State specific objectives, including any prespecified hypotheses page 4 |
| Methods | | |
| Study design | 4 | Present key elements of study design early in the paper page 4 |
| Setting | 5 | Describe the setting, locations, and relevant dates, including periods of recruitment, exposure, follow-up, and data collection page 4 |
| Participants | 6 | Give the eligibility criteria, and the sources and methods of selection of participants page 4 |
| Variables | 7 | Clearly define all outcomes, exposures, predictors, potential confounders, and effect modifiers pages 4-5. Give diagnostic criteria, if applicable n.a. |
| Data sources/ measurement | 8* | For each variable of interest, give sources of data and details of methods of assessment (measurement). Describe comparability of assessment methods if there is more than one group page 4 |
| Bias | 9 | Describe any efforts to address potential sources of bias page 4 |
| Study size | 10 | Explain how the study size was arrived at not needed, as it was a total survey |
| Quantitative variables | 11 | Explain how quantitative variables were handled in the analyses. If applicable, describe which groupings were chosen and why |
| Statistical methods | 12 | (*a*) Describe all statistical methods, including those used to control for confounding page 5 |
| (*b*) Describe any methods used to examine subgroups and interactions. Subgroup’s analysis not done |
| (*c*) Explain how missing data were addressed. Missing data did not occur in the data-set |
| (*d*) If applicable, describe analytical methods taking account of sampling strategy n.a. |
| (*e*) Describe any sensitivity analyses none done |
| Results | | |
| Participants | 13* | (a) Report numbers of individuals at each stage of study—eg numbers potentially eligible, examined for eligibility, confirmed eligible, included in the study, completing follow-up, and analysed see the flow-chart |
| (b) Give reasons for non-participation at each stage see the flow-chart |
| (c) Consider use of a flow diagram it was included |
| Descriptive data | 14* | (a) Give characteristics of study participants (eg demographic, clinical, social) and information on exposures and potential confounders Tables 1-2 |
| (b) Indicate number of participants with missing data for each variable of interest n.a. |
| Outcome data | 15* | Report numbers of outcome events or summary measures Tables 3-4 |
| Main results | 16 | (*a*) Give unadjusted estimates and, if applicable, confounder-adjusted estimates and their precision (eg, 95% confidence interval) Table 4. Make clear which confounders were adjusted for and why they were included page 5 |
| (*b*) Report category boundaries when continuous variables were categorized page 5 |
| (*c*) If relevant, consider translating estimates of relative risk into absolute risk for a meaningful time period not relavant |
| Other analyses | 17 | Report other analyses done—eg analyses of subgroups and interactions, and sensitivity analyses none of them done |
| Discussion | | |
| Key results | 18 | Summarise key results with reference to study objectives pages 7-9 |
| Limitations | 19 | Discuss limitations of the study, taking into account sources of potential bias or imprecision. Discuss both direction and magnitude of any potential bias pages9-10 |
| Interpretation | 20 | Give a cautious overall interpretation of results considering objectives, limitations, multiplicity of analyses, results from similar studies, and other relevant evidence page 10 |
| Generalisability | 21 | Discuss the generalisability (external validity) of the study results page 10 |
| Other information | | |
| Funding | 22 | Give the source of funding and the role of the funders for the present study and, if applicable, for the original study on which the present article is based title page |

*Give information separately for exposed and unexposed groups.

**Note:** An Explanation and Elaboration article discusses each checklist item and gives methodological background and published examples of transparent reporting. The STROBE checklist is best used in conjunction with this article (freely available on the Web sites of PLoS Medicine at http://www.plosmedicine.org/, Annals of Internal Medicine at http://www.annals.org/, and Epidemiology at http://www.epidem.com/). Information on the STROBE Initiative is available at www.strobe-statement.org.
